# Supplementary material for: Self-assembled graphene aerogel and nanodiamond hybrids as high performance catalysts in oxidative propane dehydrogenation
Source: Royal Society of Chemistry journal article supplement (doi:10.1039/c5ta07404e), 2015-01-01
Supplement: c5ta07404e1.pdf [file c5ta07404e1.pdf]

SUPPLEMENTARY INFORMATION

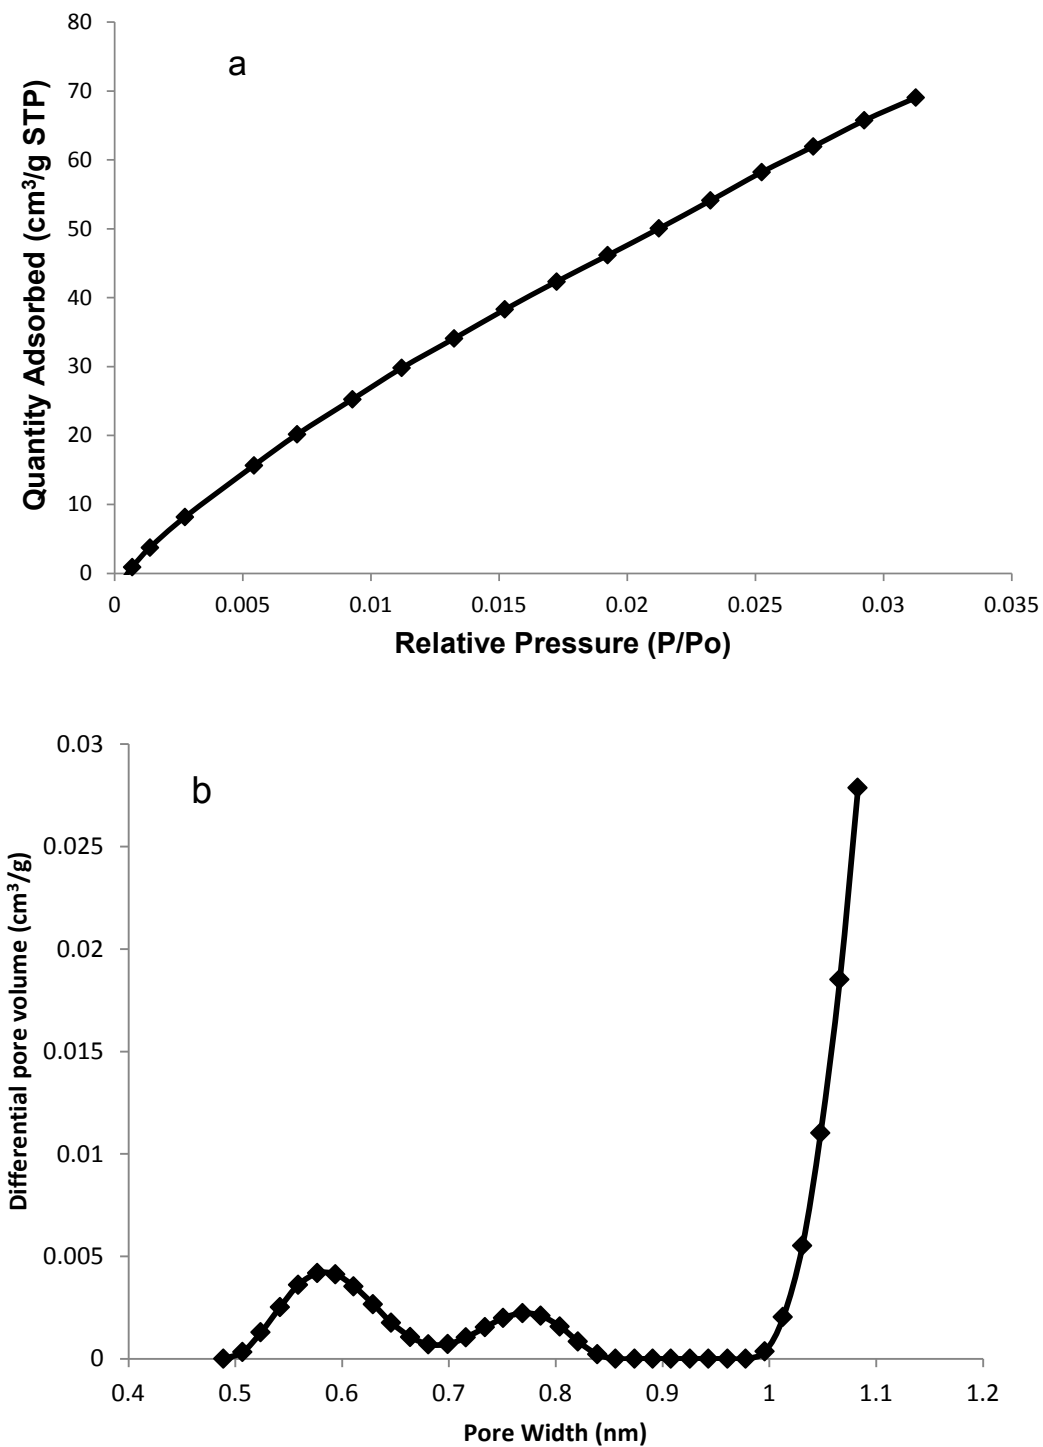

Figure S1. CO<sub>2</sub> isotherm (a) and DFT pore size distribution of RGO (b)

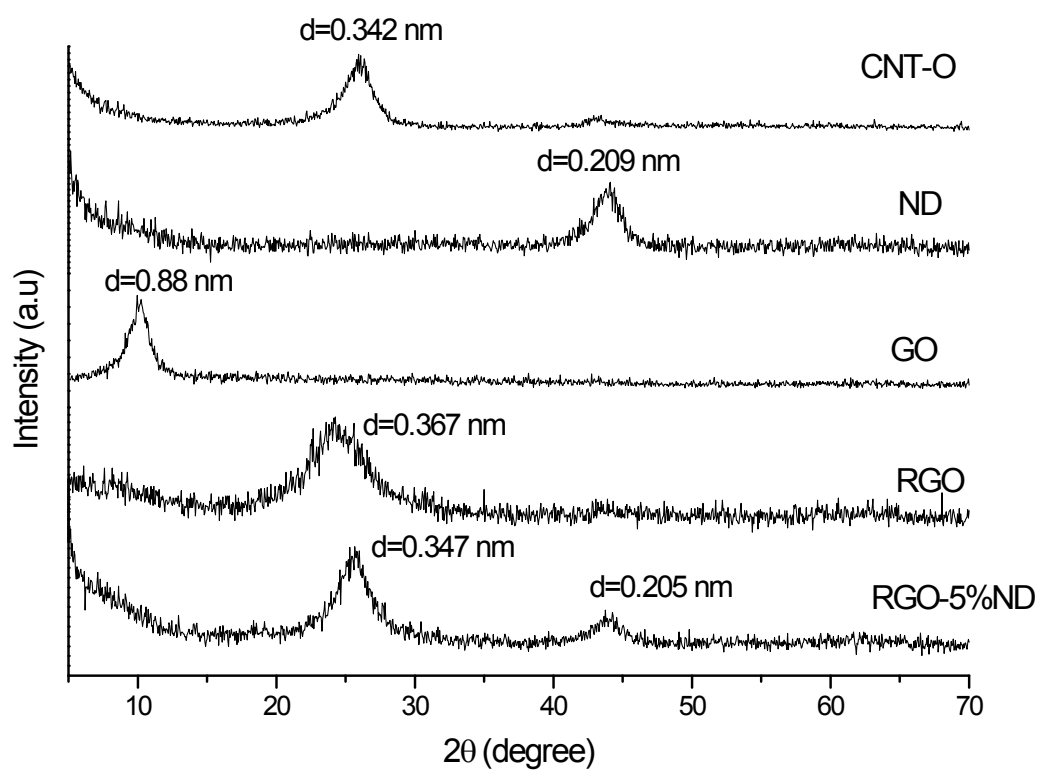

Figure S2. X-ray diffraction (XRD) pattern of several carbon materials used. The number above the peak is the interlayer distance.

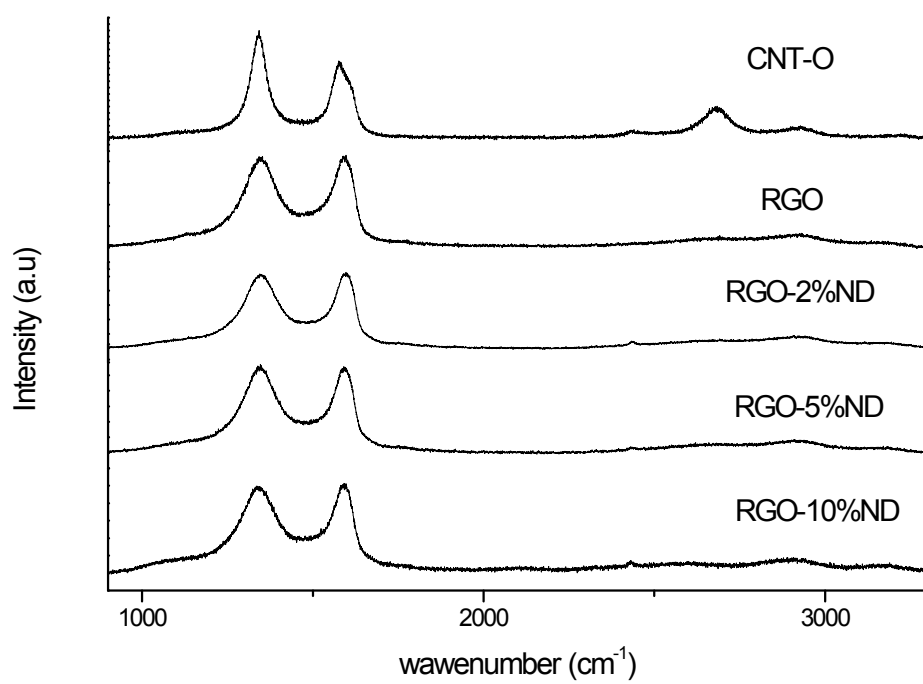

Figure S3. 1<sup>st</sup> and 2<sup>nd</sup> order Raman spectra of CNT-O, RGO and RGO+nanodiamond hybrid with several nanodiamond contents.

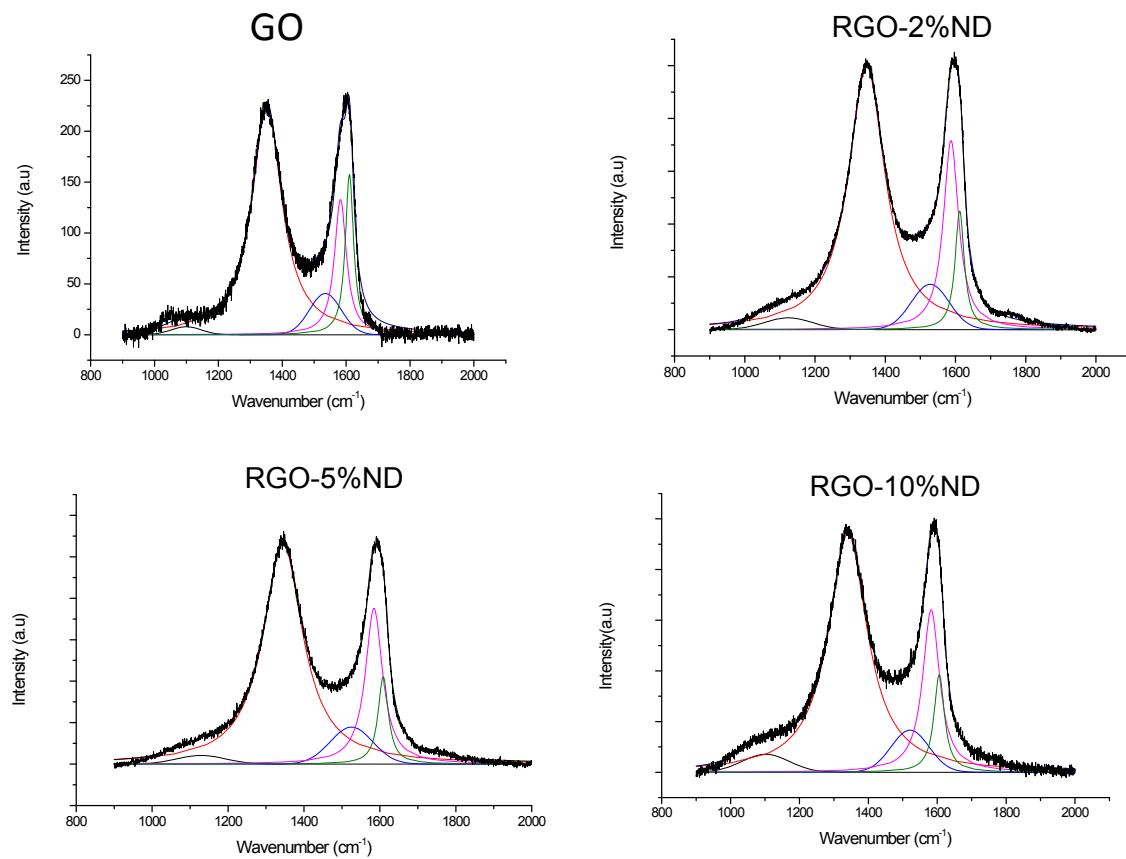

Figure S4. Fitting of 1<sup>st</sup> Raman spectra of all the samples: GO and RGO+nanodiamonds hybrids

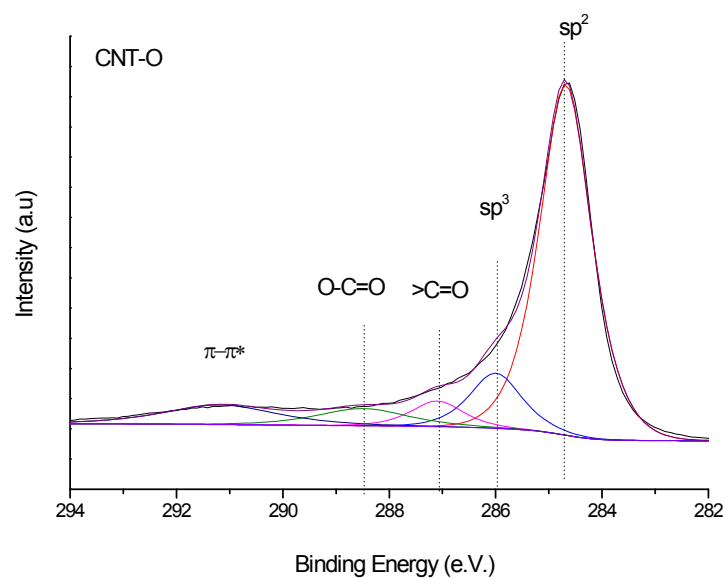

Figure S5. C 1s XPS spectra of CNT-O.

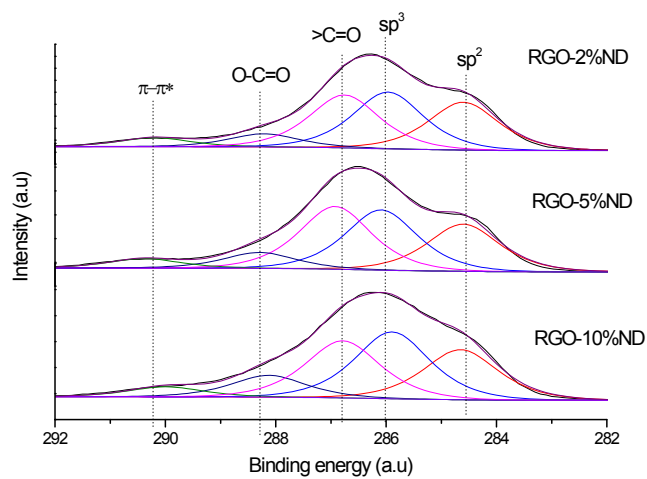

Figure S6. C 1s XPS spectra of RGO+ND hybrids with different ND contents

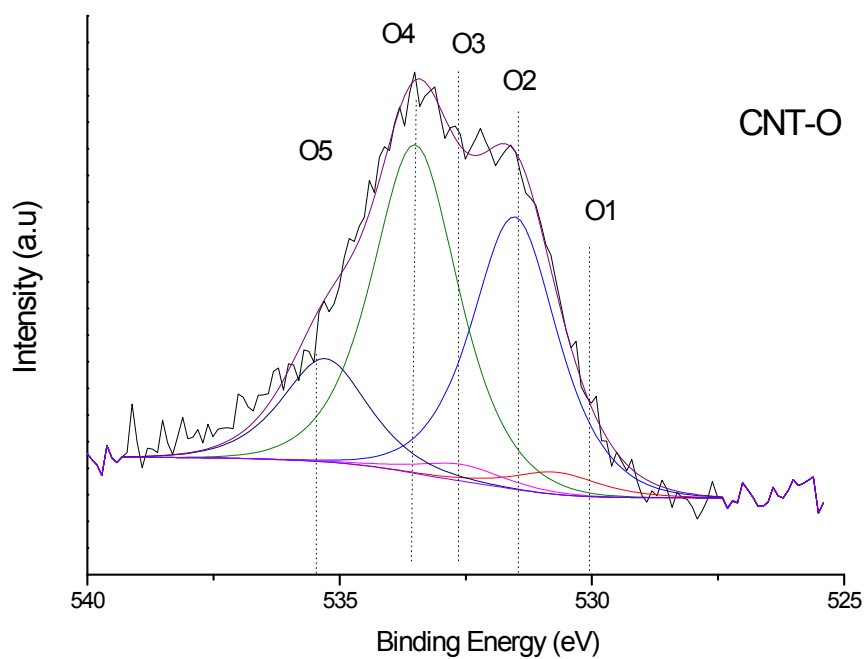

Figure S7. O 1s XPS spectra of CNT-O

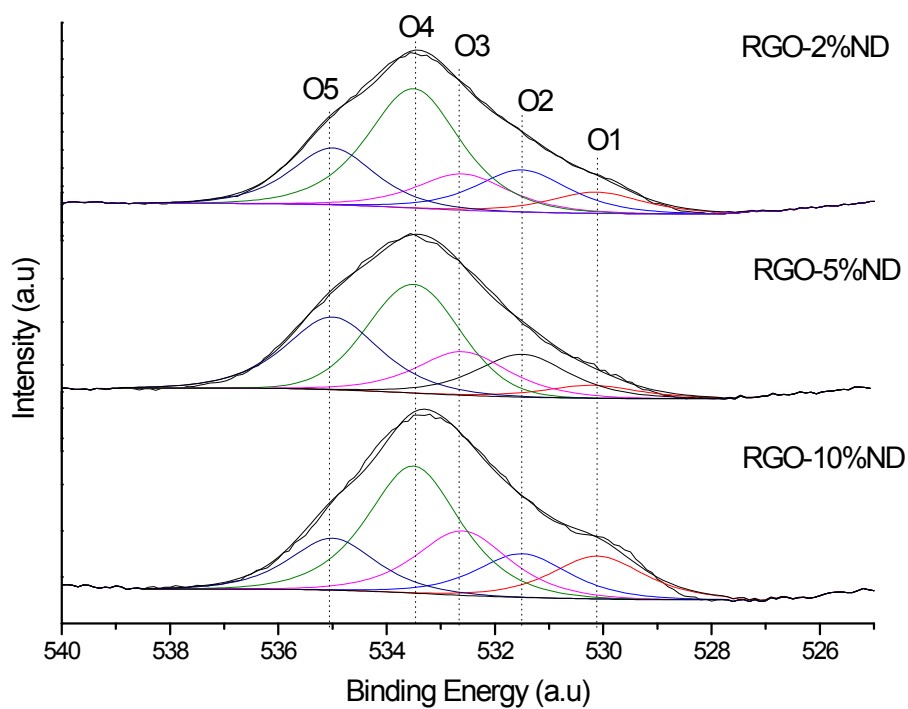

Figure S8. O 1s XPS spectra of RGO+ND hybrids with different ND content
